# Supplementary material for: An open-access stress magnitude database for Germany and adjacent regions
Source: Springer Nature journal article supplement (doi:10.1186/s40517-020-00178-5), 2020-09-22
Supplement: MOESM1 [file 40517_2020_178_MOESM1_ESM.pdf]

## Additional file 1: Information included in the stress magnitude database

Table 1 List of parameters in database

| label in data file | explanation ( <i>unit/range</i> )                                                  |
|--------------------|------------------------------------------------------------------------------------|
| ID                 | identifier for newly presented WSM subdataset                                      |
| LAT                | latitude ( <i>decimal degrees, -90° - +90°, South latitude is negative</i> )       |
| LOn                | longitude ( <i>decimal degrees, -180° - +180°, West longitude is negative</i> )    |
| UTM_ZONE           | zone of the Universal Transverse Mercator coordinate system                        |
| UTM.E; UTM.N       | easting and northing values in the UTM system                                      |
| UTM.HORDAT         | horizontal datum (e.g. WGS 84, NAD 83 or ETRS 89)                                  |
| DEPTH              | depth below surface, same as true vertical depth below ground level ( <i>km</i> )  |
| DEPTH_DEV          | indicated depth if reference datum is deviating from ground level ( <i>km</i> )    |
| DEPTH_REF          | height of the reference datum of DEPTH.DEV (e.g. Kelly bushing) ( <i>km</i> )      |
| SITE               | site description I: site code as e.g. given in publications and reports            |
| LOCALITY           | site description II: name of location or well                                      |
| COUNTRY            | country                                                                            |
| TYPE               | stress magnitude indicator ( <i>abbreviations see next page of this document</i> ) |
| AZI                | azimuthal orientation of the max. horizontal stress ( <i>degrees</i> )             |
| AZI.SD             | standard deviation of azimuth from reference or WSM ( <i>degrees</i> )             |
| QU_AZI             | quality of azimuth information (WSM quality) ( <i>A-E</i> )                        |
| REG                | stress regime ( <i>abbreviations see next page of this document</i> )              |
| Nb                 | number of single measurements                                                      |
| TOP                | top of measurement interval ( <i>km</i> )                                          |
| BOT                | bottom of measurement interval ( <i>km</i> )                                       |
| S1_MAG*            | magnitude of max. principle stress ( <i>MPa</i> )                                  |
| S1_MAG.EFF         | magnitude of effective max. principle stress ( <i>MPa</i> )                        |
| S2_MAG*            | magnitude of medium principle stress ( <i>MPa</i> )                                |
| S2_MAG.EFF         | magnitude of effective medium principle stress ( <i>MPa</i> )                      |
| S3_MAG*            | magnitude of min. principle stress ( <i>MPa</i> )                                  |
| S3_MAG.EFF         | magnitude of effective min. principle stress ( <i>MPa</i> )                        |
| Shmin*             | magnitude of min. horizontal stress ( <i>MPa</i> )                                 |
| Shmin_lowb         | lower bound of min. horizontal stress magnitude ( <i>MPa</i> )                     |
| Shmin_upp          | upper bound of min. horizontal stress magnitude ( <i>MPa</i> )                     |
| Shmin_eff          | magnitude of effective min. horizontal stress ( <i>MPa</i> )                       |
| SHmax*             | magnitude of max. horizontal stress ( <i>MPa</i> )                                 |
| SHmax_lowb         | lower bound of max. horizontal stress magnitude ( <i>MPa</i> )                     |
| SHmax_upp          | upper bound of max. horizontal stress magnitude ( <i>MPa</i> )                     |
| SHmax_eff          | magnitude of effective max. horizontal stress ( <i>MPa</i> )                       |
| Sv*                | magnitude of vertical stress ( <i>MPa</i> )                                        |
| Sv_eff             | magnitude of effective vertical stress ( <i>MPa</i> )                              |
| YOUNG              | Young's modulus ( <i>GPa</i> )                                                     |
| POISSON            | Poisson ratio                                                                      |
| ROCK               | rock type                                                                          |
| UNIT               | lithostratigraphic unit                                                            |
| rho_rock           | rock density (measured or estimated) ( <i>g/cm<sup>3</sup></i> )                   |
| TS_insitu          | in-situ tensile strength ( <i>MPa</i> )                                            |
| P0                 | pore pressure ( <i>MPa</i> )                                                       |
| Pb*                | (formation) breakdown pressure ( <i>MPa</i> )                                      |
| Pr*                | reopening pressure ( <i>MPa</i> )                                                  |
| Psi*               | (instantaneous) shut-in pressure ( <i>MPa</i> )                                    |
| LOP                | leak-off pressure ( <i>MPa</i> )                                                   |
| FPP*               | formation propagation pressure ( <i>MPa</i> )                                      |
| FCP*               | fracture closure pressure ( <i>MPa</i> )                                           |
| V_inj              | injected fluid volume ( <i>litres</i> )                                            |
| frac_AZ            | azimuth of opened fracture ( <i>degrees</i> )                                      |
| frac_DIP           | dipping angle of opened fracture with respect to the horizontal ( <i>degrees</i> ) |

continued on next page

Continuation of Table 1

| label in data file           | explanation ( <i>unit/range</i> )                                                                                                              |
|------------------------------|------------------------------------------------------------------------------------------------------------------------------------------------|
| doubt_entry                  | parameters of explicitly questionable reliability ( <i>parameter label</i> )                                                                   |
| COMMENT                      | comments (e.g. additional information or details on the measurement, limitations of interpretation etc., reference to corresponding WSM-entry) |
| REF1; REF2; REF3             | reference shortcuts ( <i>see Additional file 3</i> ); written-out publication information is also possible.                                    |
| REF1.DOI; REF2.DOI; REF3.DOI | DOIs to references (if applicable)                                                                                                             |
| QUALITY                      | quality assignment ( <i>A–E</i> )                                                                                                              |

Legend to Table 1

|                                  |                                                                                                                  |
|----------------------------------|------------------------------------------------------------------------------------------------------------------|
| *parameter marked<br>by asterisk | data compilation table includes column with the parameter's standard deviation or uncertainty given in reference |
| red                              | obligatory fields                                                                                                |
| magenta                          | obligatory fields generated according to the database record                                                     |
| orange                           | at least one piece of stress magnitude information required                                                      |
| blue                             | specifically apply to fluid injection methods                                                                    |
| black                            | general fields potentially fillable for all database records.                                                    |

Table 2 Abbreviation keys for stress magnitude indicators

| abbreviation | indicator                                       |
|--------------|-------------------------------------------------|
| BO           | borehole breakouts                              |
| BS           | borehole slotter                                |
| CF           | centerline fractures                            |
| CM           | measurements on core samples                    |
| DIF          | drilling induced fractures                      |
| FIT          | formation integrity test (or limit test)        |
| FL           | frictional limit considerations                 |
| HF           | hydrofrac                                       |
| HFG          | hydrofrac with gradient information (from WSM)  |
| HFM          | hydrofrac with magnitude information (from WSM) |
| HFU          | unspecified borehole fluid indicators           |
| IDFPI        | implicit drilling fluid pressure indicators     |
| HTPF         | hydraulic testing of pre-existing fractures     |
| LOT          | leak-off test                                   |
| MF           | minifrac test                                   |
| OC           | overcoring                                      |
| WVA          | wave velocity anisotropy analysis               |

Table 3 Abbreviation keys for stress regimes

| abbreviation | stress regime                             | relative stress magnitudes  |
|--------------|-------------------------------------------|-----------------------------|
| NF           | normal faulting                           | $S_V > S_{Hmax} > S_{hmin}$ |
| NS           | combination of TF with SS (transpression) |                             |
| SS           | strike-slip                               | $S_{Hmax} > S_V > S_{hmin}$ |
| TS           | combination of NF with SS (transtension)  |                             |
| TF           | thrust faulting                           | $S_{Hmax} > S_{hmin} > S_V$ |
