# Supplementary material for: An open-access stress magnitude database for Germany and adjacent regions
Source: Springer Nature journal article supplement (doi:10.1186/s40517-020-00178-5), 2020-09-22
Supplement: MOESM3 [file 40517_2020_178_MOESM3_ESM.pdf]

**Additional file 3: Key to reference labels included in the data compilation**

| <b>label</b> | <b>reference</b> | <b>label</b> | <b>reference</b> |
|--------------|------------------|--------------|------------------|
| ALBEB A2015  | [1]              | INNEX X1977  | [43]             |
| ALBEFR2011   | [2]              | KLEEBE2013   | [44]             |
| AZZOVA2019   | [3]              | KLEERU1993   | [45]             |
| BACKME2017   | [4]              | KLEERU1999   | [46]             |
| BANKBA1995   | [5]              | KOHLET1979   | [47]             |
| BANKGR1993   | [6]              | KOHLET1980   | [48]             |
| BAUMIL1983   | [7]              | KONIWA2010   | [49]             |
| BAUMRU1987   | [8]              | KRAFXX1984   | [50]             |
| BAUMRU1989   | [9]              | LEOPXX1978   | [51]             |
| BAUMRU1990   | [10]             | MARTLA2003   | [52]             |
| BAUMXX1982   | [11]             | MEIXSC2014   | [53]             |
| BAUMXX1986   | [12]             | MJAKXX1983   | [54]             |
| BECKPA1990   | [13]             | MOECSC2008   | [55]             |
| BECKPA1992   | [14]             | NAGRXX2000   | [56]             |
| BECKWE1994   | [15]             | NATAWE1984   | [57]             |
| BECKXX1985   | [16]             | OLDEHA1993   | [58]             |
| BECKXX1999   | [17]             | ORZOJU2005   | [59]             |
| BECKXX2000   | [18]             | PUSTSC1995   | [60]             |
| BERGXX1998   | [19]             | ROECLE2003   | [61]             |
| BRUDXX1995   | [20]             | ROECNA1993   | [62]             |
| BRUDZO1997   | [21]             | RUMMBA1982   | [63]             |
| BRUERO1975   | [22]             | RUMMBA1983   | [64]             |
| BUDAMO2017   | [23]             | RUMMBA1983B  | [65]             |
| CARNRO1976   | [24]             | RUMMBA1987   | [66]             |
| CORNBE2007   | [25]             | RUMMBA1992   | [67]             |
| CORNBU1992   | [26]             | RUMMJU1975   | [68]             |
| CORNXX1983   | [27]             | RUMMWI1983   | [69]             |
| CORNXX1988   | [28]             | RUMMXX1980   | [70]             |
| DREWHO2019   | [29]             | RUMMXX1983   | [71]             |
| DREWSE2019   | [30]             | SCHIXX1978   | [72]             |
| ELMOXX1982   | [31]             | SCHMXX1981   | [73]             |
| FLECRE2004   | [32]             | SEITST2015   | [74]             |
| GREIIL1977   | [33]             | TISCEV2010   | [75]             |
| GREIXX1975   | [34]             | TISCKR2013   | [76]             |
| GREIXX1975a  | [35]             | TRAUHU2005   | [77]             |
| GREIXX1978   | [36]             | TRAUSC2010   | [78]             |
| GRUNST1992   | [37]             | VALLEV2007   | [79]             |
| GYSEXX1975   | [38]             | VALLEV2019   | [80]             |
| HAERSC2008   | [39]             | WOLTBE2000   | [81]             |
| HARTXX1993   | [40]             | WOLTXX1987   | [82]             |
| ILLIGR1978   | [41]             | ZOBABA1997   | [83]             |
| ILLIGR1979   | [42]             |              |                  |

- [1] Alber, M., Backers, T., Bartmann, K., Brenne, S., Dinter, S., Dresen, G., Gipper, P., Grühser, C., Heft, S., Meier, T., Molenda, M., Röske, F., and Stöckhert, F. (2015). Erforschung der Mechanismen und Simulation hydraulisch induzierter Risse in geklüfteten Gesteinen für die Optimierung des Aufschlusses geothermischer Lagerstätten: Abschlussbericht zum Verbundprojekt. Report BMWi Fkz 0325279A/B, Ruhr-Universität Bochum, geomecon GmbH.
- [2] Alber, M. and Fritschen, R. (2011). Rock mechanical analysis of a  $M_L = 4.0$  seismic event induced by mining in the Saar District, Germany. *Geophysical Journal International*, 168(1):359–372.
- [3] Azzola, J., Valley, B., Schmittbuhl, J., and Genter, A. (2019). Stress Characterization and Temporal Evolution of Borehole Failure at the Rittershoffen Geothermal Project. *Solid Earth Discussions*, 2019:1–64.
- [4] Backers, T., Meier, T., Gipper, P., Munsch, P., Bücken, D., Nokar, K., Dinter, S., Grühser, C., Heft, S., and Röske, F. (2017). Abschlussbericht zum Teilprojekt B: Struktur- und Spannungsfeld im Verbundprojekt MAFA. Parametrisierung von Fazies, Diagenese, Struktur- und Spannungsfeld sowie Optimierung der Testabläufe im Malm zur Verringerung des Erfolgsrisikos; Teilprojekt B: Struktur- und Spannungsfeld. Report BMWi Fkz 0325673B, geomecon GmbH; Geothermie Neubrandenburg GmbH.
- [5] Bankwitz, P., Bankwitz, E., Franzke, H., Rauche, H., and Dannapfel, M. (1995). In Situ Spannungsmessungen in Thüringen und Sachsen. *Brandenburgische Geowiss. Beitr.*, 2:77 – 94. 7 Abb., 2 Tab., 29 Lit.; also as DFG Scientific Technical Report STR95/04.
- [6] Bankwitz, P., Gross, U., and Bankwitz, E. (1993). Krustendeformation im Bereich der Finne-Kyffhäuser-Gera-Jachymov-Zone. *Z. geol. Wiss.*, 21 (1/2):3 – 20.
- [7] Baumann, H. and Illies, H. (1983). Stress field and strain release in the Rhenish Massif. In Fuchs, K., Von Gehlen, K., Mälzer, H., Murawski, H., and Semmel, A., editors, *Plateau Uplift*, pages 177–186. Springer-Verlag, Berlin Heidelberg.
- [8] Baumgärtner, J., Rummel, F., and Zhaotan, C. (1987). Wireline hydraulic fracturing stress measurements in the Falkenberg granite massif. *Geol. Jahrb., Reihe E*, 39:83–99.
- [9] Baumgärtner, J. and Rummel, F. (1989). Experience with "Fracture Pressurization tests" as a Stress Measuring Technique in a Jointed Rock Mass. *International Journal of Rock Mechanics and Mining Sciences*, 26(6):661–671.
- [10] Baumgärtner, J., Rummel, F., and Zoback, M. (1990). Hydraulic fracturing in situ stress measurements to 3 km depth in the KTB pilot hole. Report, University of Karlsruhe.
- [11] Baumann, H. (1982). *Spannung und Spannungsumwandlung im Rheinischen Schiefergebirge*. Numismat. Verlag, Koblenz.
- [12] Baumann, H. (1986). Der Hohenzollerngraben - Wirkung einer tiefreichenden Störung auf das Spannungsfeld. Report, University of Karlsruhe.
- [13] Becker, A. and Paladini, S. (1990). In situ-Spannungen in Nord- und Mitteleuropa. *Schriftenreihe Angewandte Geologie Karlsruhe, Band 10*.
- [14] Becker, A. and Paladini, S. (1992). Intra-plate stresses in Europe and plate-driving mechanisms. *Annales Tectonicae*, VI(2):173–192.
- [15] Becker, A. and Werner, D. (1994). Strain measurements with the borehole slotter. *Terra Nova*, 6(6):608–617.
- [16] Becker, A. (1985). *Messungen und Interpretation oberflächennaher in-situ-Spannungen am Südost-Ende des Oberrheingrabens und im Tafeljura*. Doctoral thesis, University of Karlsruhe.
- [17] Becker, A. (1999). In situ stress data from the Jura Mountains; new results and interpretation. *Terra Nova*, 11(1):9–15.
- [18] Becker, A. (2000). The Jura Mountains - an active foreland fold-and-thrust belt? *Tectonophysics*, 321:381–406.
- [19] Berghofer, K. (1998). Entwicklung und Trends bei der Fracstimulation von Rotliegend Erdgasbohrungen. In *Frühjahrstagung, Aufsuchung und Gewinnung; Celle, Germany*, 9801, pages 99–112. DGMK Deutsche Wissenschaftliche Gesellschaft für Erdöl, Erdgas und Kohle.
- [20] Brudy, M. (1995). *Determination of in-situ stress magnitude and orientation to 9 km depth at the KTB site*. PhD thesis, University of Karlsruhe.

- [21] Brudy, M., Zoback, M., Fuchs, K., Rummel, F., and Baumgärtner, J. (1997). Estimation of the complete stress tensor to 8 km depth in the KTB scientific drill holes: Implications for crustal strength. *Journal of Geophysical Research*, 102:18,453–18,475.
- [22] Brückl, E., Roch, K., and Scheidegger, A. (1975). Significance of stress measurements in the Hochkönig Massif in Austria. *Developments in Geotectonics*, 9:315–322.
- [23] Budach, I., Moeck, I., Lüschen, E., and Wolfgramm, M. (2017). Temporal evolution of fault systems in the Upper Jurassic of the Central German Molasse Basin: case study Unterhaching. *International Journal of Earth Sciences*, 102(2):635–653.
- [24] Carniel, P. and Roch, K.-H. (1976). In situ Gebirgsspannungsmessungen im Felbertal, Österreich. *Riv. ital. geof. sci. aff.*, 3:233–240.
- [25] Cornet, F. H., Berard, T., and Bourrouis, S. (2007). How close to failure is a granite rock mass at a 5 km depth? *International Journal of Rock Mechanics & Mining Sciences*, 44:47–66.
- [26] Cornet, F. and Buret, D. (1992). Stress field determination in France by hydraulic tests in boreholes. *Journal of Geophysical Research*, 97:11,829–11,849.
- [27] Cornet, F. (1982). Analysis of Injection Tests for In Situ Stress Determination. In *Proceedings of Workshop XVII - Workshop on Hydraulic Fracturing Stress Measurements; Convened under Auspices of National Earthquake Hazards Reduction Program, 2-5 December 1981; Sponsored by U.S. National Committee of Rock Mechanics*, pages 414–443, Menlo Park, California. United States Department of the Interior Geological Survey.
- [28] Cornet, F. (1988). Two examples of stress measurements by the H.T.P.F. method. *The 29th U.S. Symposium on Rock Mechanics (USRMS), 13-15 June, Minneapolis, Minnesota*, pages 615–624.
- [29] Drews, M. C., Hofstetter, P., Zosseder, K., Straubinger, R., Gahr, A., and Stollhofen, H. (2019a). Predictability and controlling factors of overpressure in the North Alpine Foreland Basin, SE Germany: an interdisciplinary post-drill analysis of the Geretsried GEN-1 deep geothermal well. *Geothermal Energy*, 7(1):3.
- [30] Drews, M. C., Seithel, R., Savvatis, A., Kohl, T., and Stollhofen, H. (2019b). A normal-faulting stress regime in the Bavarian Foreland Molasse Basin? New evidence from detailed analysis of leak-off and formation integrity tests in the greater Munich area, SE-Germany. *Tectonophysics*, 755:1–9.
- [31] Elmohandes, S.-E. (1982). *Geotektonische Modellversuche zur Grabenbildung ergänzt durch in situ-stress Messung am Nordende des Rheingrabens bei Wetzlar*. Diploma thesis, University of Karlsruhe.
- [32] Fleckenstein, P., Reuschke, G., Müller, B., and Connolly, P. (2004). Predicting stress re-orientations associated with major geological structures in sedimentary sequences. DGMK research report 593-5, Geophysical Institute University of Karlsruhe. unpublished.
- [33] Greiner, G. and Illies, J. H. (1977). Central Europe: Active or Residual Tectonic Stresses. *Pageoph*, 115:12–26.
- [34] Greiner, G. (1975a). In-situ stress measurements in southwest Germany. *Tectonophysics*, 29:265–274.
- [35] Greiner, G. (1975b). In-situ stress measurements in the region of the Rhine graben rift system. Progress Report, Geodynamics Project.
- [36] Greiner, G. (1978). *Spannungen in der Erdkruste, Bestimmung und Interpretation am Beispiel von in-situ Messungen im süddeutschen Raum*. Doctoral thesis, University of Karlsruhe.
- [37] Grünthal, G. and Stromeyer, D. (1992). The recent crustal stress field in central Europe: Trajectories and finite element modeling. *Journal of Geophysical Research*, 97(B8):11,805–11,820.
- [38] Gysel, M. (1975). In-situ stress measurements of the primary stress state in the Sonnenberg tunnel in Lucerne, Switzerland. *Tectonophysics*, 29(1):301 – 314. Recent crustal movements.
- [39] Häring, M. O., Schanz, U., Ladner, F., and Dyer, B. C. (2008). Characterisation of the Basel 1 enhanced geothermal system. *Geothermics*, 37(5):469–495.
- [40] Hartkorn, P. (1993). Schacht Pöthen. - Interfels-Bericht 9396-S. Report, Interfels GmbH.
- [41] Illies, J. and Greiner, G. (1978). Rhinegraben and the Alpine system. *Geological Society of America Bulletin*, pages 770–782.
- [42] Illies, J. and Greiner, G. (1979). Holocene movements and state of stress in the Rhinegraben rift system. *Tectonophysics*, 52:347–359.

- [43] Innerhofer, G. (1977). Stress measurements of the rock - mass in the headrace tunnel Langenegg. *International Symposium on Field Measurements in Rock Mechanics*, pages 247–253.
- [44] Klee, G. and Becker, F. (2013). SBB Bözbergtunnel Projekt. Hydraulic-Fracturing Spannungsmessungen in der Bohrung B2/13. Report, NAGRA, MeSy Solexperts.
- [45] Klee, G. and Rummel, F. (1993). Hydrofrac Stress Data for the European HDR Research Project Test Site Soultz-Sous-Forêts. *Int. J. Rock Mech. Min. Sci. & Geomech. Abstr.*, 30(7):973–976.
- [46] Klee, G. and Rummel, F. (1999). Sondierbohrung Benken: Hydrofrac-Spannungsmessungen. Internal Report, Nagra, Wettingen.
- [47] Kohlbeck, F., Scheidegger, A., and Sturgul, J. (1979). Geomechanical model of an Alpine valley, Wien. *Rock Mechanics*, 12:1–14.
- [48] Kohlbeck, F., Roch, K., and Scheidegger, A. (1980). In Situ stress measurements in Austria. *Rock Mechanics*, Supplement 9:21–29.
- [49] Konietzky, H., Walter, K., and Lunow, C. (2010). Tiefengeothermie Sachsen, Teilbericht 1/4, Spannungsfeld und Materialdaten. Report, Technische Universität Bergakademie Freiberg, Institut für Geotechnik, Lehrstuhl für Felsmechanik.
- [50] Kraft, K.-H. (1984). *In situ Gesteinsspannungsmessungen im Grund- und Deckgebirge von Oberfranken/Nordost-Bayern*. Doctoral thesis, University of Bayreuth.
- [51] Leopoldt, W. (1978). *In situ Spannungsmessungen im Bereich des nördlichen Kaiserstuhls/Südwestdeutschland*. Diploma thesis, University of Karlsruhe, Germany. unpublished.
- [52] Martin, C. and Lanyon, G. (2003). Measurement of in-situ stress in weak rocks at Mont Terri Rock Laboratory, Switzerland. *International Journal of Rock Mechanics and Mining Sciences*, 40:1077–1088.
- [53] Meixner, J., Schill, E., Gaucher, E., and Kohl, T. (2014). Inferring the in situ stress regime in deep sediments: an example from the Bruchsal geothermal site. *Geothermal Energy*, 2(7).
- [54] Mjakisev, V. (1983). *Untersuchung des Gebirgsspannungszustandes im Südostteil der DDR*. Doctoral thesis, Bergakademie Freiberg.
- [55] Moeck, I., Schandelmeier, H., and Holl, H.-G. (2009). The stress regime in a Rotliegend reservoir of the Northeast German Basin. *Int. J. Earth Sc.*, 98:1643–1654.
- [56] NAGRA (2001). Sondierbohrung Benken. Untersuchungsbericht Nagra Technical Reports NTB 00-01, NAGRA.
- [57] Natau, O. and Wenz, E. (1984). Bestimmung des vollständigen Spannungszustandes mit verschiedenen Meßmethoden in der Süddeutschen Scholle und im Harz. Bericht an die DFG, SFB 108 A2, Karlsruhe.
- [58] Oldeboershuis, H. and Hartkorn, P. (1993). Pumpspeicherwerk Goldisthal. - Interfels-Bericht 9328. Report, Interfels GmbH.
- [59] Orzol, J., Jung, R., Jatho, R., Tischner, T., and Kehrer, P. (2005). The GeneSys-Project: Extraction of geothermal heat from tight sediments. In *Proceedings of the World Geothermal Congress, Antalya, Turkey, 24-29 April 2005*, pages 1–9.
- [60] Pust, G. and Schamp, J. (1995). Horizontal-Multifrac Söhlingen Z-10: Bohrtechnische Planung und Durchführung. *Erdöl, Erdgas, Kohle*, 10:413–417.
- [61] Röckel, T. and Lempp, C. (2003). Der Spannungszustand im Norddeutschen Becken. *Erdöl, Erdgas, Kohle*, 119(2):73–80.
- [62] Röckel, T. and Natau, O. (1993). Estimation of the maximum horizontal stress magnitude from drilling induced fractures and centerline fractures at the KTB drill site. *KTB Report*, 93(2):183–186.
- [63] Rummel, F. and Baumgärtner, J. (1982). Spannungsmessungen im östlichen Bereich der Südwestdeutschen Scholle. Report RUB-7084408-82-3, Ruhr University Bochum to the Federal Bureau of Geoscience and Resources, Hannover.
- [64] Rummel, F. and Baumgärtner, J. (1983). Manipulation der Frac-Ausbreitung im geklüftetem Fels, Laborversuche und Feldversuche im Testgebiet Falkenberg. Annual Report 1982 RUB Az. 7084404-82, Ruhr-Universität Bochum, Institut für Geophysik.
- [65] Rummel, F., Baumgaertner, J., and Alheid, H. J. (1983). Hydraulic Fracturing Stress Measurements Along the Eastern Boundary of the SW-German Block. In *Hydraulic fracturing stress measurements*, pages 3–17. National Academy Press.

- [66] Rummel, F. and Baumgaertner, J. (1987). Hydrofrac Spannungsmessungen in den geothermischen Erkundungsbohrungen des KTB-Programms im Schwarzwald und in der Oberpfalz. Report, Ruhr-Universität Bochum, Institut für Geophysik. Bericht an die DFG, DFG-Az.: Ru 225/9-1.
- [67] Rummel, F. and Baumgärtner, J. (1992). Hydraulic fracturing stress measurements in the GPK1 borehole, Soultz-Sous-Forêts. In Bresee, J., editor, *Geothermal Energy in Europe, The Soultz Hot Dry Rock Project*, page 119. Gordon & Breach Science Publishers.
- [68] Rummel, F. and Jung, R. (1975). Hydraulic Fracturing stress measurements near the Hohenzollern-Graben structure, SW Germany. *Pure Applied Geophysics*, 113:321–330.
- [69] Rummel, F. and Winter, R. B. (1983). Fracture mechanics approach to hydraulic fracturing stress measurements. *Earthquake Prediction Research*, 2:33–45.
- [70] Rummel, F. (1980). Hydraulic Fracturing Spannungsmessungen in der Bohrung KB 28/5 (NBS H/W Süd, Mühlbergtunnel). Report, Ruhr University Bochum.
- [71] Rummel, F. (1983). Personal Communication.
- [72] Schirmer, P. (1978). *In situ Spannungsmessungen in Baden-Baden und deren Interpretation*. Diploma thesis, University of Karlsruhe. unpublished.
- [73] Schmitt, T. (1981). The West European stress field: new data and interpretation. *Journal of Structural Geology*, 3:309–315.
- [74] Seithel, R., Steiner, U., Müller, B., Hecht, C., and Kohl, T. (2015). Local stress anomaly in the Bavarian Molasse Basin. *Geothermal Energy*, 3(4).
- [75] Tischner, T., Evers, H., Hauswirth, H., Jatho, R., Kosinowski, M., and Sulzbacher, H. (2010). New concepts for extracting geothermal energy from one well: the GeneSys-Project. In *Proceedings of the world geothermal congress, Bali, Indonesia, 25-29 April 2010*.
- [76] Tischner, T., Krug, S., Pechan, E., Hesshaus, A., Jatho, R., Bischoff, M., and Wonik, T. (2013). Massive hydraulic fracturing in low permeable sedimentary rock in the GeneSys project. In *Proceedings, Thirty-Eights Workshop on Geothermal Reservoir Engineering, SGP-TR-198, Stanford University, Stanford, California, 11-13 February 2013*.
- [77] Trautwein, U. and Huenges, E. (2005). Poroelastic behaviour of physical properties in Rotliegend sandstones under uniaxial strain. *International Journal of Rock Mechanics & Mining Sciences*, 42:924–932.
- [78] Trautwein-Bruns, U., Schulze, K. C., Becker, S., Kukla, P. A., and Urai, J. L. (2010). In situ stress variations at the Variscan deformation front - Results from the deep Aachen geothermal well. *Tectonophysics*, 493:196–211.
- [79] Valley, B. and Evans, K. F. (2007). Stress state at Soultz-Sous-Forêts to 5 km depth from well-bore failure and hydraulic observations. In *Proceedings of the 32nd workshop on geothermal reservoir engineering. Stanford University, Stanford, California, January 22-24, 2007*.
- [80] Valley, B. and Evans, K. F. (2019). Stress magnitudes in the Basel enhanced geothermal system. *International Journal of Rock Mechanics and Mining Sciences*, 118:1–20.
- [81] Wolter, K. E. and Berners, H. (2000). Bohrlochstabilität in Abhängigkeit von den Gebirgsspannungsverhältnissen. *Erdöl, Erdgas, Kohle*, 116(10).
- [82] Wolter, K. (1987). *Untersuchung der in situ Spannung, Residualspannung und der Mikroriss-Systeme in Graniten Süddeutschlands*. Doctoral thesis, University of Karlsruhe.
- [83] Zoback, M. and Harjes, H.-P. (1997). Injection-induced earthquakes and crustal stress at 9 km depth at the KTB deep drilling site. *Journal of Geophysical Research*, 102:18,477–18,491.
